# Supplementary material
Source: ML conference proceedings conference paper supplement (https://openreview.net/forum?id=lnnNPiZtzR)
Supplement: supplementary_material [file attachment]

---

# Supplementary Materials for

## FungiTastic: A multi-modal dataset and benchmark for image categorization

---

1 The authors accept full responsibility for any rights violations related to this dataset. The dataset is  
2 published under the GNU General Public License (GPL3) for non-commercial use only.

### 3 1 Online resources

4 The complexity and size of the dataset require hosting the dataset in multiple spaces. Since the *Kaggle*  
5 *dataset* is allowing to store datasets just up to around 140GB we provide images for the vanilla  
6 FungiTastic dataset in smaller resolution. The full-size images, as well as the Croissant metadata, are  
7 available for download through dataset documentation.

8 Apart from the dataset, we also provide a wide variety of assets. Notably, we provide:

- 9 • *FGVC*, a Pytorch-based framework designed for training deep learning classification models,  
10 hyperparameter fine-tuning, Weights&Biases logging, ONNX model export and HuggingFace  
11 deployment.
- 12 • *Sample notebooks* that allows loading pre-trained models, prediction and making submission on  
13 Kaggle benchmarks.
- 14 • All baseline *pre-trained models* available through the HuggingFace model hub allowing a straight-  
15 forward integration and usability.
- 16 • A comprehensive documentation with tables data samples and training strategies.

### 17 2 Supporting Figures

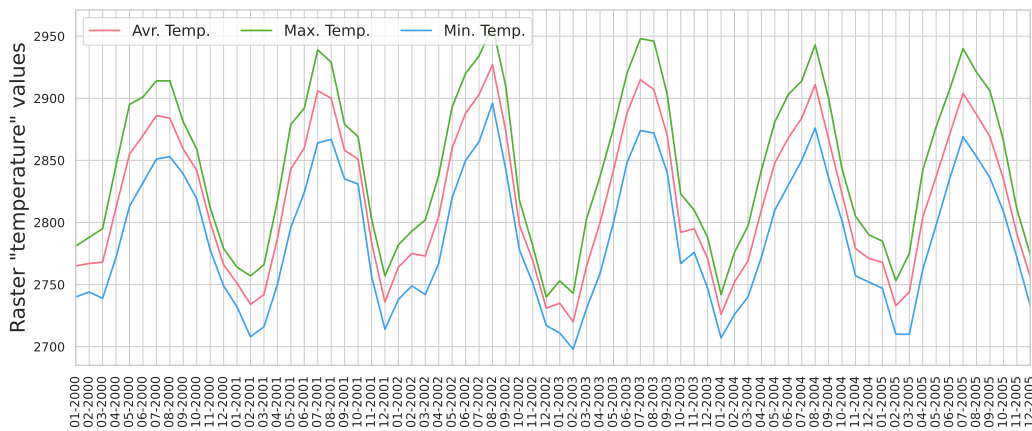

Figure 1: **Sample of available temperature data.** First 5 years out of 20 available years.

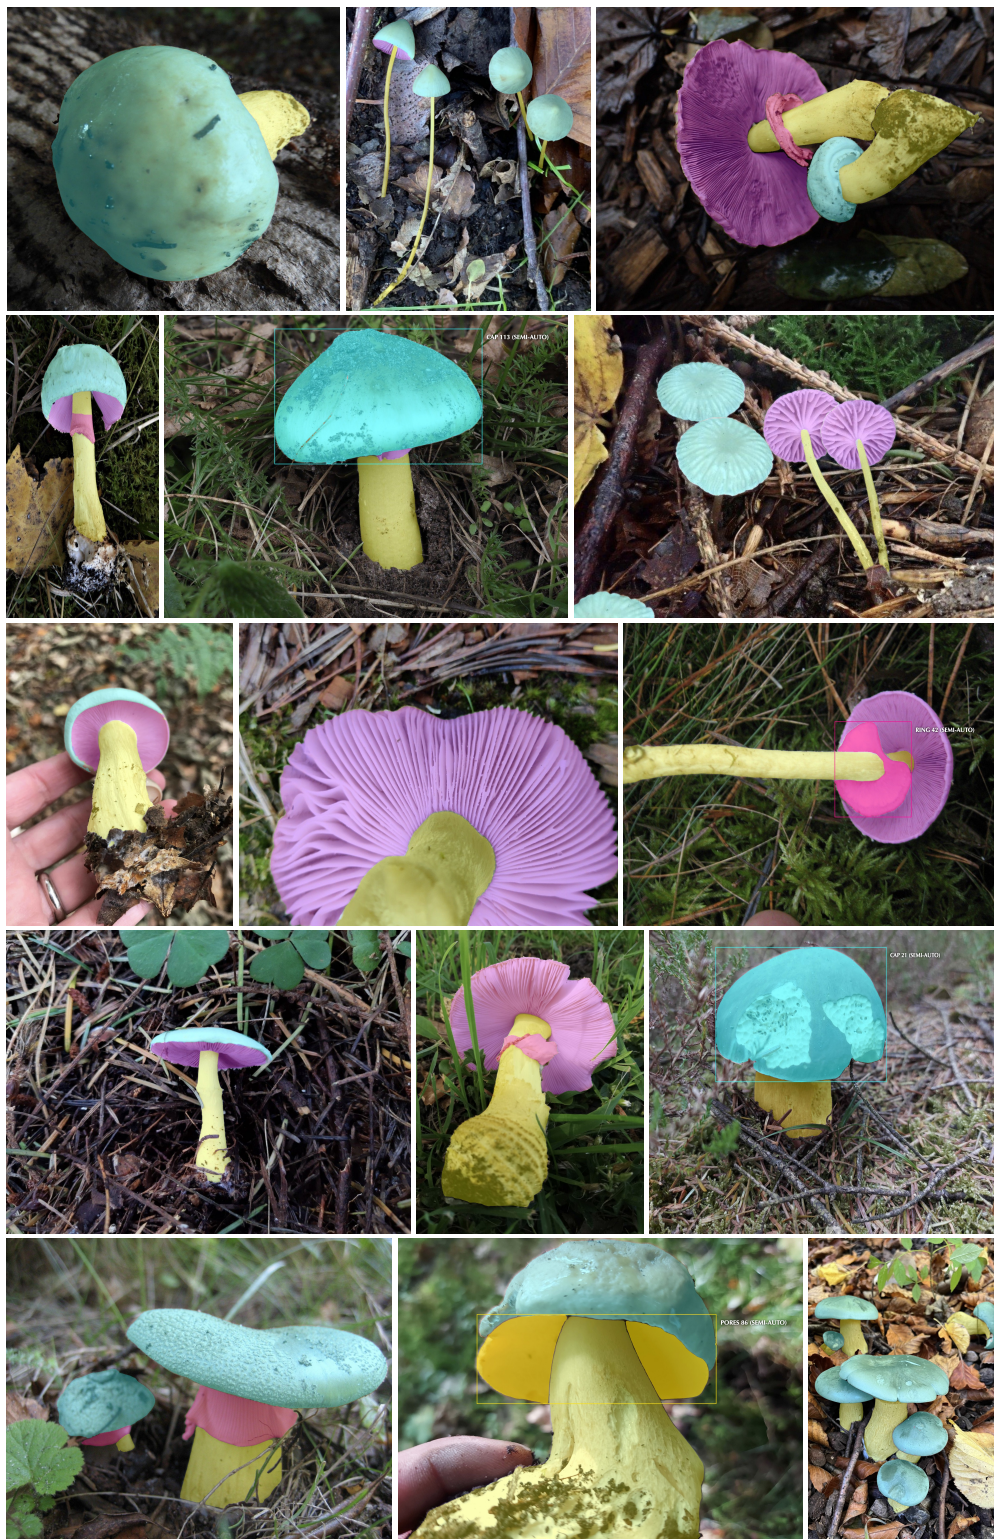

Figure 2: Additional samples of fruiting body part segmentation.
